# Supplementary material for: Fabrication of a multifunctional ionic covalent organic framework via the Menshutkin reaction and ion-exchange for dual-mode detection of organochlorine pesticides and design of a smartphone sensing platform
Source: Royal Society of Chemistry journal article supplement (doi:10.1039/d4qi01698j), 2024-01-01
Supplement: d4qi01698j1.pdf [file d4qi01698j1.pdf]

**Fabrication of Multifunctional Ionic Covalent Organic  
Framework via Menshutkin Reaction and Ion-Exchange for  
Dual-Mode Detection of Organochlorine Pesticides and Design  
of Smartphone Sensing Platform**

*Xiaoqin Shen, Bing Yan\**

*School of Chemical Science and Engineering, Tongji University, Siping Road 1239, Shanghai  
200092, China.*

**1. Experimental section**

\* Corresponding author: Email address: [byan@tongji.edu.cn](mailto:byan@tongji.edu.cn) (Bing Yan)

## 1.1. Materials

All the other solvents and reagents were obtained commercially and used without further purification. Deionized water was used throughout the experiments. 2,4,6-Tris(4-aminophenyl)triazine (Tta) (98%), tris(4-formylphenyl)amine (Tfa) (98%), benzyl bromide (BnBr) (98%), methyl blue (MB) (98%), 2,6-dichloro-4-nitroaniline (DCN) (95%), dicamba (DMA) (99%), agarose (AG) (95%), sulfamethoxazole (98%), flusilazole (98%), cyfluthrin (95%), carboxin (98%), alidochlor (97%), methylparaben (99%) and glyphosate (96%) were purchased from Adamas-beta. NaCl (99%), KCl (99%), CaCl<sub>2</sub> (96%), MgCl<sub>2</sub> (99%), ZnCl<sub>2</sub> (98%), Na<sub>2</sub>CO<sub>3</sub> (99%), Na<sub>2</sub>SO<sub>4</sub> (99%) were purchased from Sigma-Aldrich. Diethyl ether (98%) was purchased from Sinopharm. *n*-Butanol (*n*-BuOH) (99.5%), *o*-dichlorobenzene (*o*-DCB) (98%), acetic acid (AcOH) (99.8%), ethanol (EtOH) (95%), acetonitrile (MeCN) (99%), methanol (MeOH) (99.5%), tetrahydrofuran (THF) (99.5%), and *N,N*-dimethylformamide (DMF) (99.5%) were purchased from Greagent.

## 1.2. Instruments

The powder X-ray diffraction (PXRD) patterns were recorded on Bruker D8 ADVANCE diffractometer employing Cu K $\alpha$  radiation (40 mA and 40 kV) with a 2 $\theta$  range from 3° to 45° at room temperature. The surface morphology and EDS analysis were performed on Hitachi S-4800 field emission scanning electron microscope (SEM) with a voltage of 5 kV-15 kV. Fourier transform infrared (FT-IR) spectra were obtained by a Nexus 912 AO446 infrared spectrum radiometer in the wavenumber range of 4000 – 400 cm<sup>-1</sup>. X-ray photoelectron spectroscopy (XPS) spectra were

noted under the ultrahigh vacuum ( $< 10^{-6}$  Pa) at pass energy (93.90 eV) with Axis Ultra DLD spectrometer (Kratos, Japan) by employing an Mg K $\alpha$  (1253.6 eV) anode. Thermogravimetric (TG) curves were measured on a TA TGA 55 system operating at a heating rate of 10 °C/min in the range of 25 °C up to 700 °C under N<sub>2</sub> atmosphere. The fluorescence spectra were obtained on an Edinburgh FLS920 spectrophotometer employing 450 W xenon lamp as the source of excitation with appropriate cutoff filter. The UV-vis absorption spectra were carried on an Agilent 8453 spectrometer. The pH values of aqueous solutions were determined by an INESA PHS-25 pH meter with an E-201F pH composite electrode, which was carefully calibrated by standard buffer solution before testing. The HOMO-LUMO orbital energies were optimized by the B3LYP hybrid density functional and the basis set was 6-31G (d).

## Supporting figures

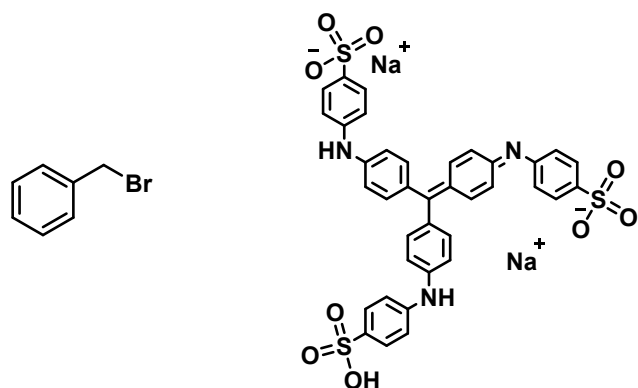

**BnBr**

**MB**

**Scheme S1** Structure of BnBr and MB.

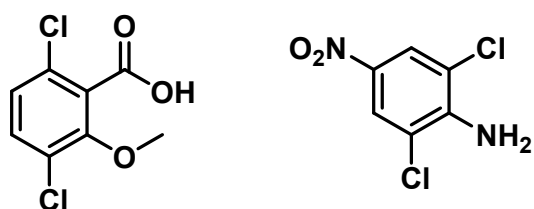

**DMA**

**DCN**

**Scheme S2** Structure of DMA and DCN.

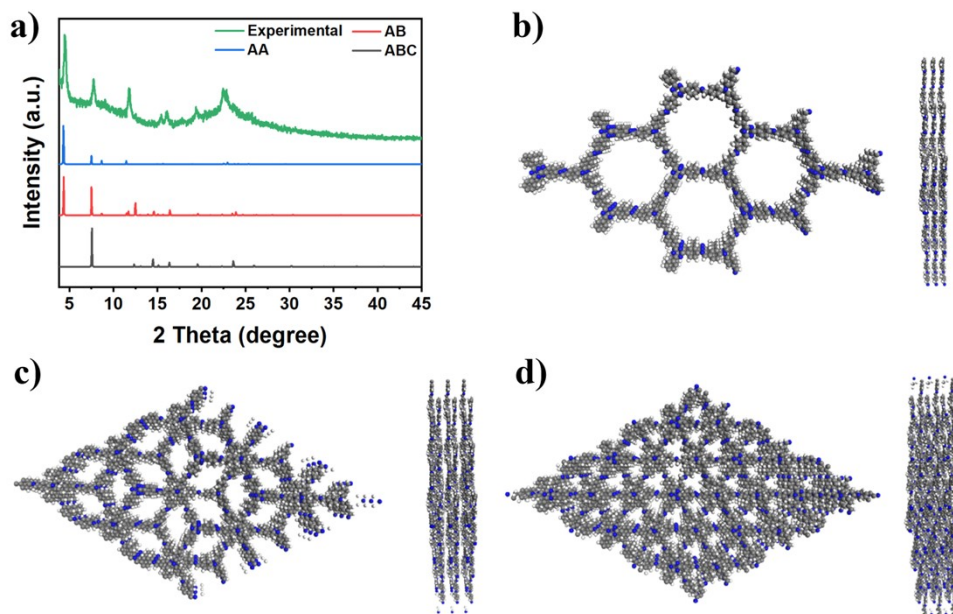

**Fig. S1** a) PXRd patterns of synthesized TfaTta and simulated TfaTta with AA, AB and ABC stacking modes. b) AA-stacking model, c) AB-stacking model and d) ABC-stacking model of TfaTta.

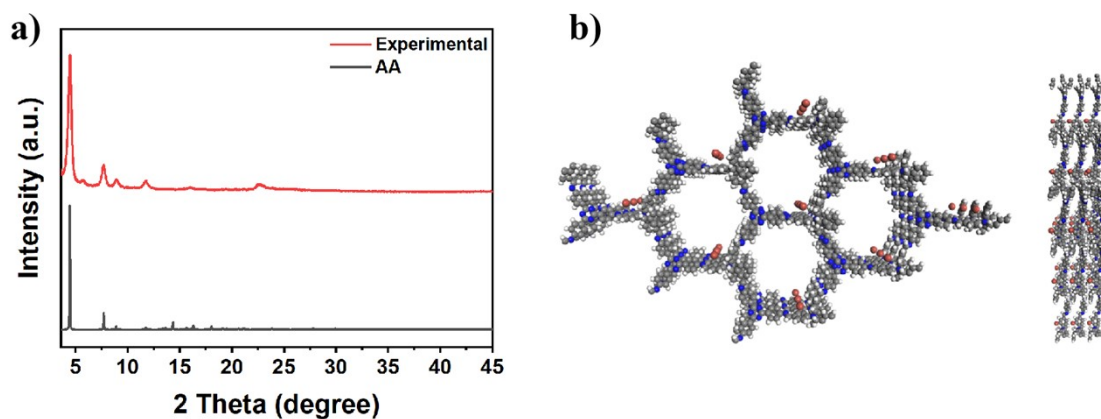

**Fig. S2** a) PXRd patterns of synthesized TfaTta-Br and simulated AA stacking mode of TfaTta-Br. b) AA-stacking model of TfaTta-Br.

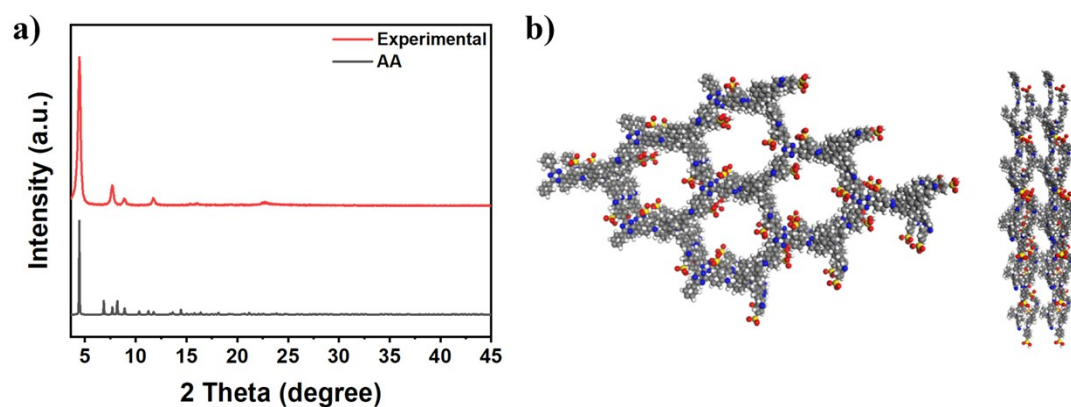

**Fig. S3** a) PXRd patterns of synthesized TfaTta-MB and simulated AA stacking mode of TfaTta-MB. b) AA-stacking model of TfaTta-MB.

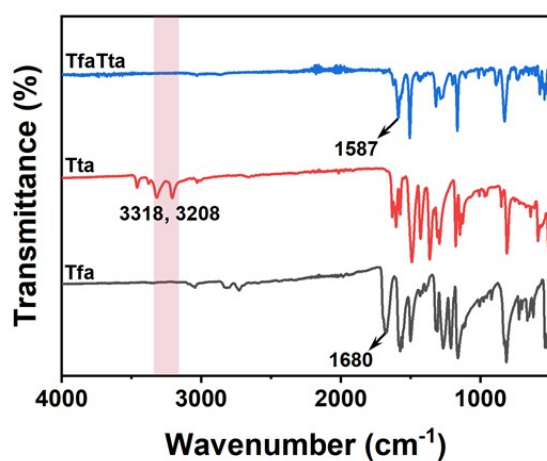

**Fig. S4** FT-IR spectra of Tfa, Tta and TfaTta.

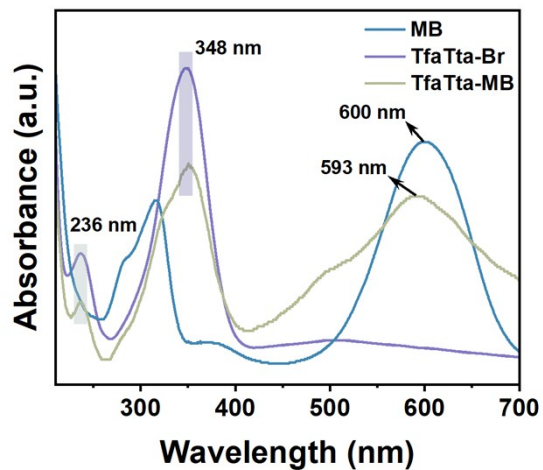

Fig. S5 UV-vis absorption spectra of MB, TfaTta-Br and TfaTta-MB.

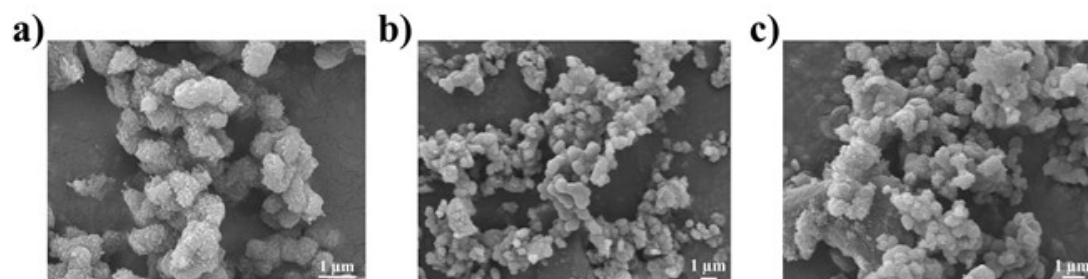

Fig. S6 SEM image of a) TfaTta, b) TfaTta-Br and c) TfaTta-MB.

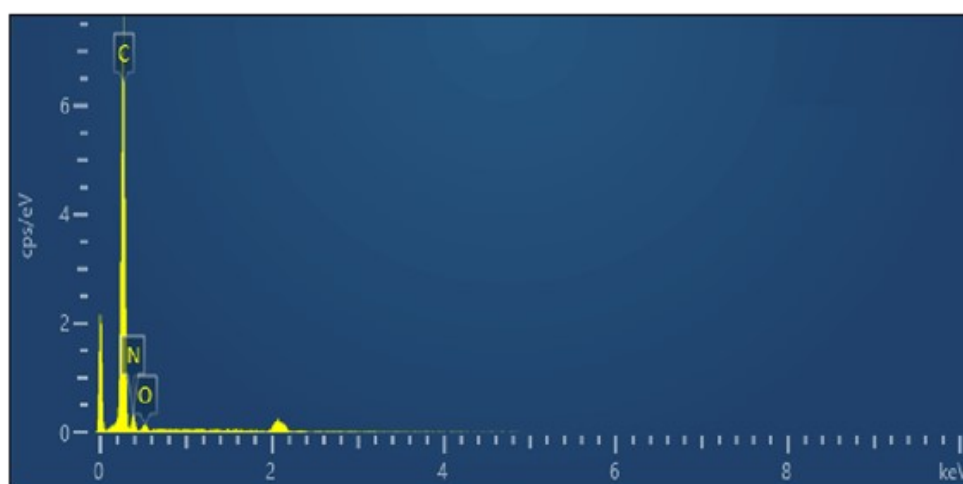

| Element | Wt %  | Wt % Sigma |
|---------|-------|------------|
| C       | 85.25 | 1.13       |
| N       | 12.65 | 1.10       |
| O       | 2.10  | 0.39       |

Fig. S7 EDS analysis of TfaTta.

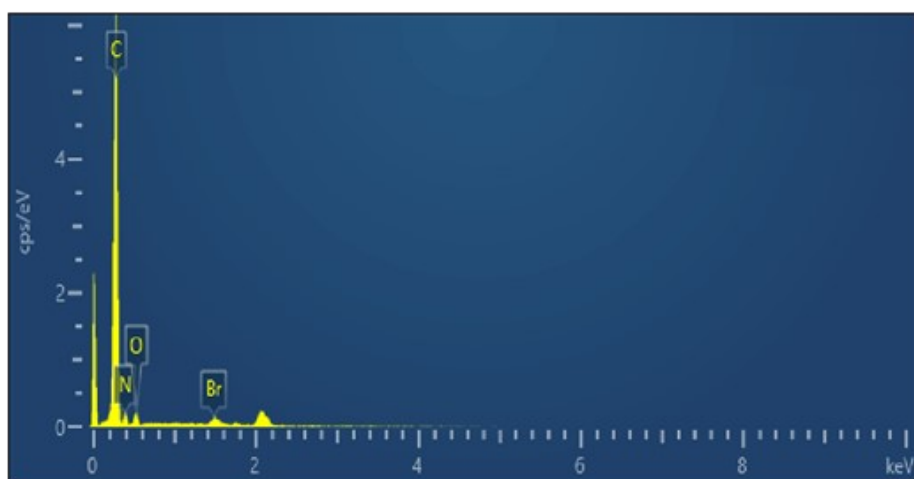

| Element | Wt %  | Wt % Sigma |
|---------|-------|------------|
| C       | 83.07 | 1.19       |
| N       | 8.46  | 0.93       |
| O       | 3.75  | 0.39       |
| Br      | 4.71  | 0.86       |

**Fig. S8** EDS analysis of TfaTta-Br.

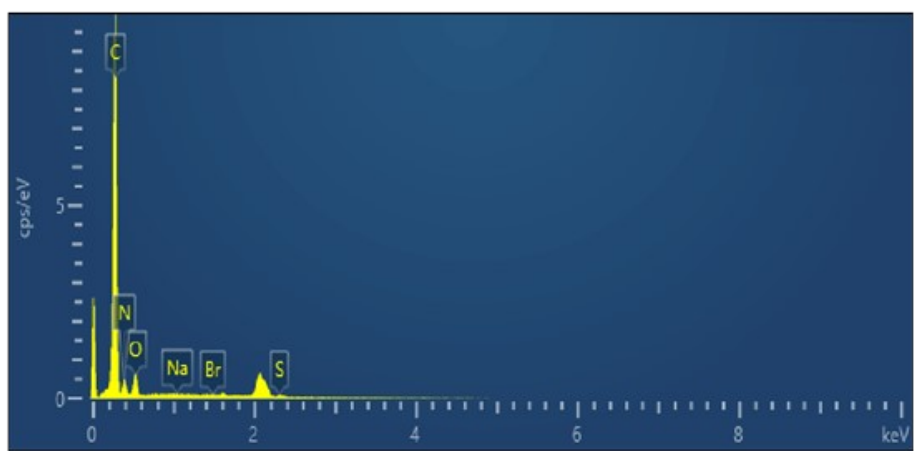

| Element | Wt %  | Wt % Sigma |
|---------|-------|------------|
| C       | 79.01 | 0.85       |
| N       | 10.85 | 0.73       |
| O       | 6.80  | 0.35       |
| S       | 3.34  | 0.54       |
| Br      | 0.00  | 0.51       |
| Na      | 0.00  | 0.16       |

**Fig. S9** EDS analysis of TfaTta-MB.

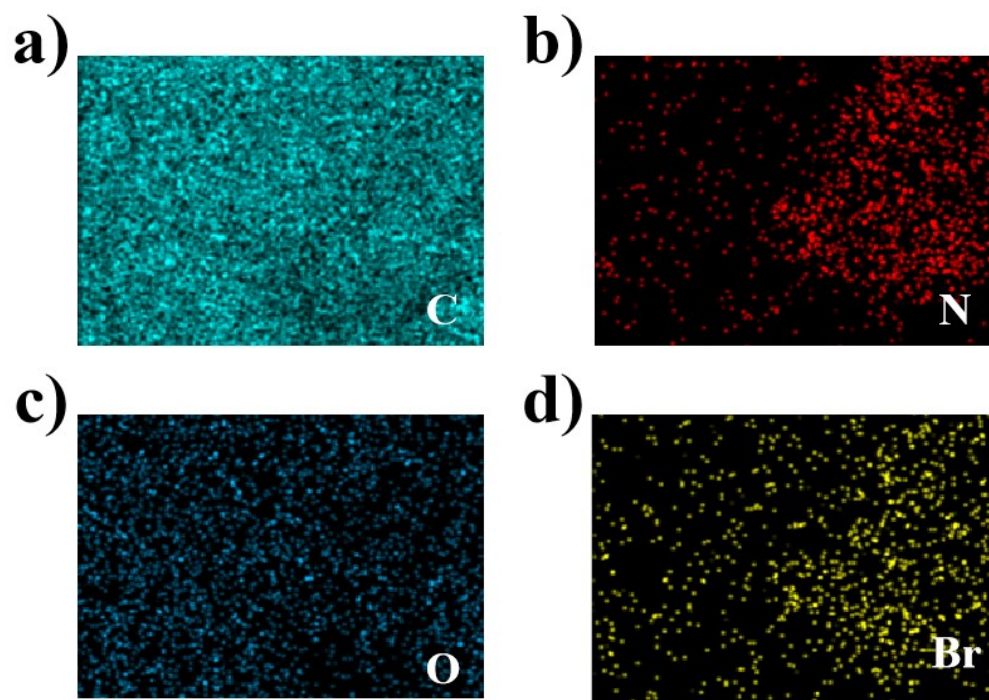

**Fig. S10** EDS mapping images of C, N, O and Br in TfaTta-Br.

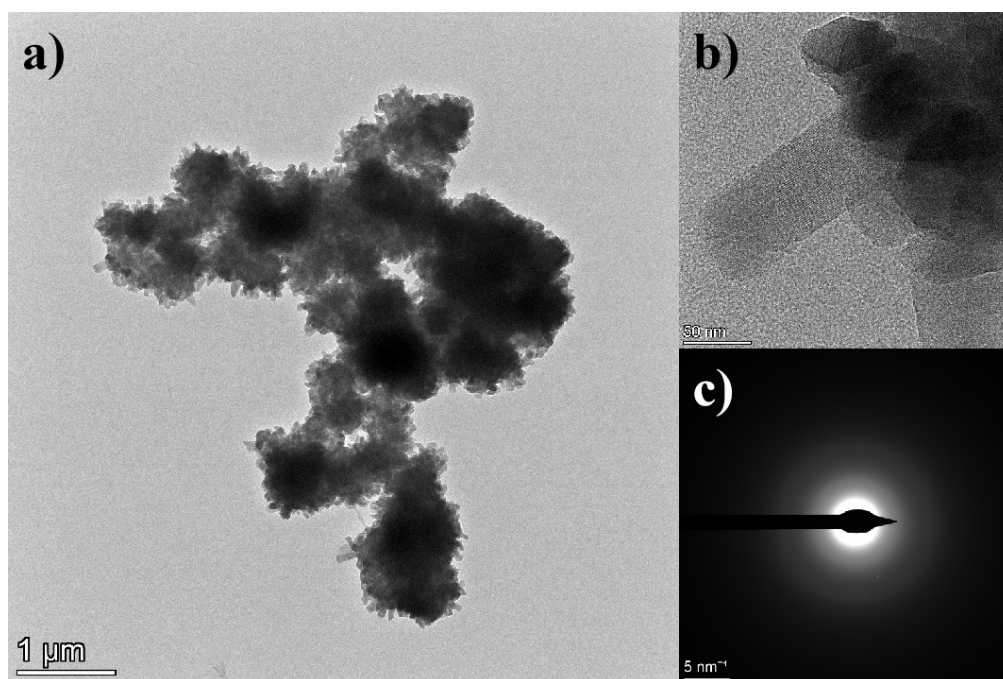

**Fig. S11** a-b) TEM image images and c) SAED pattern of TfaTta.



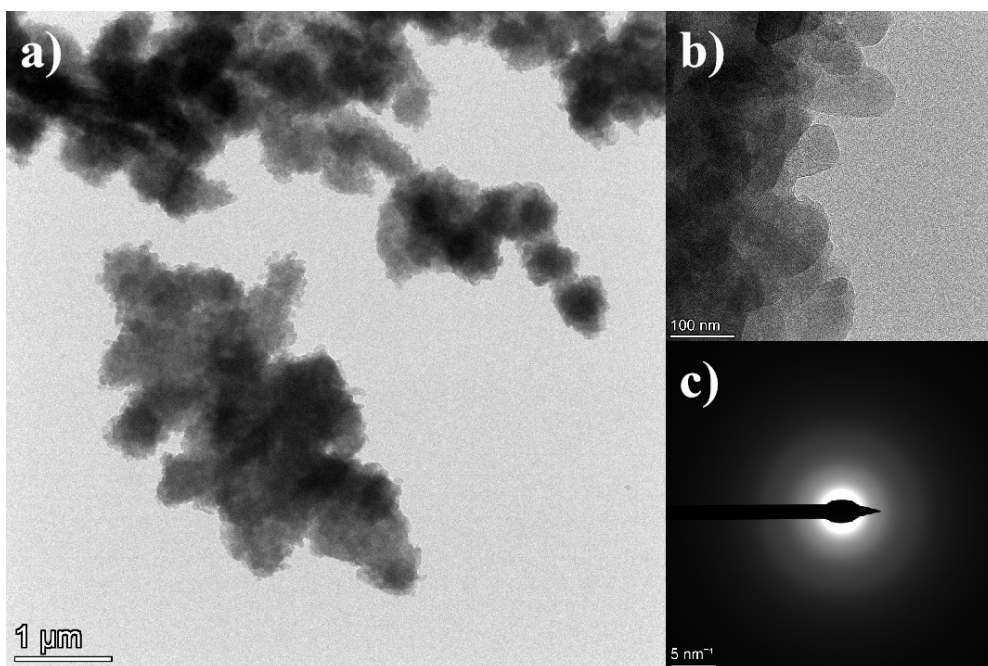

**Fig. S12** a-b) TEM image images and c) SAED pattern of TfaTta-Br.

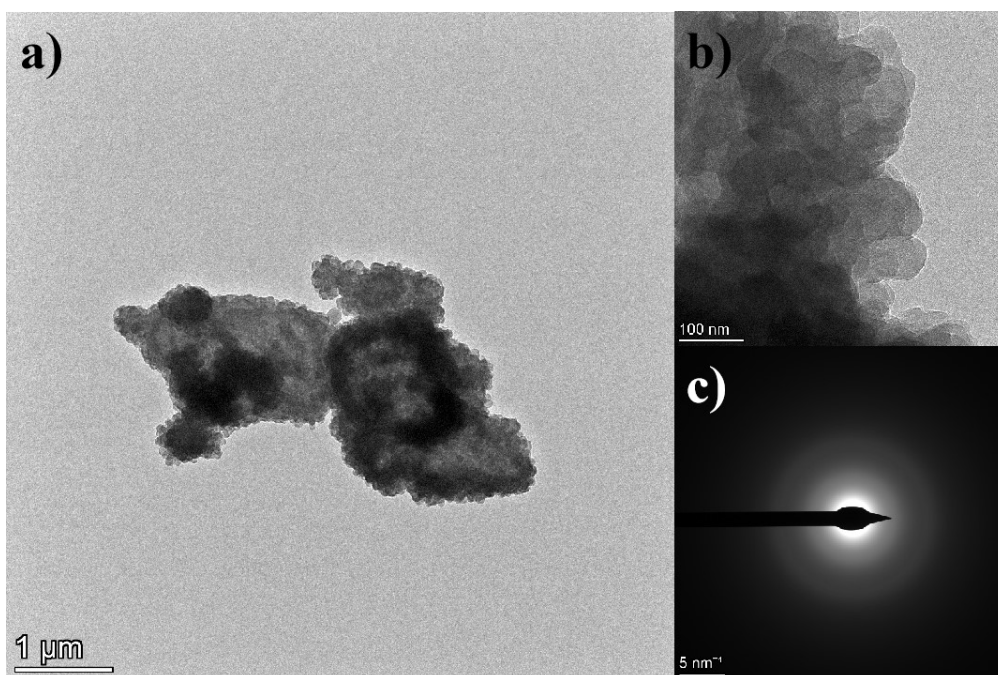

**Fig. S13** a-b) TEM images and c) SAED pattern of TfaTta-MB.

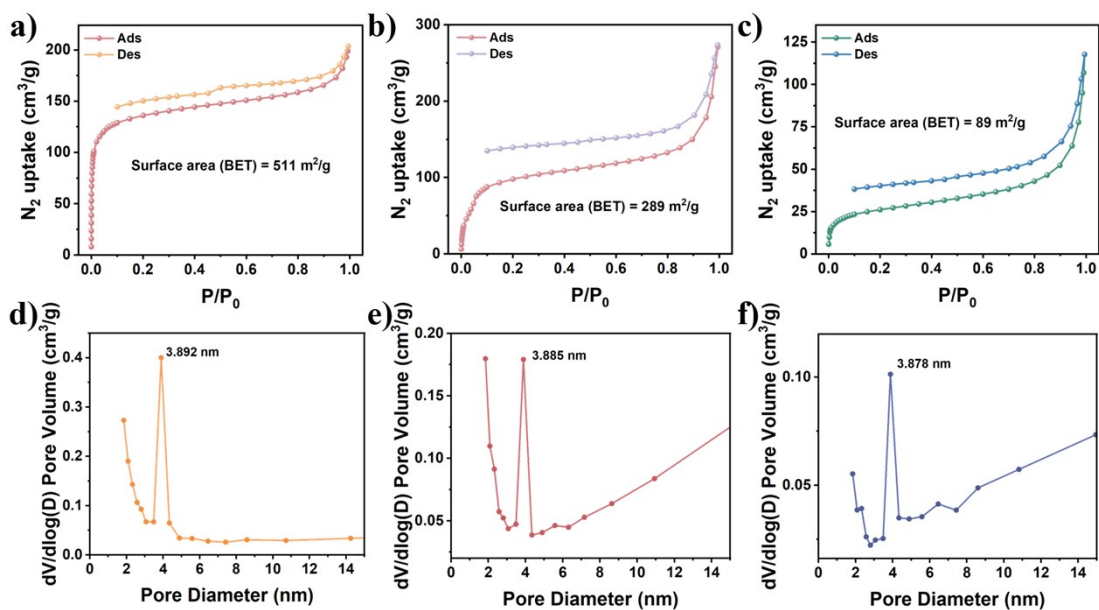

**Fig. S14** a-c)  $N_2$  adsorption–desorption isotherms of TfaTta, TfaTta-Br and TfaTta-MB. d-f) Pore size distribution of TfaTta, TfaTta-Br and TfaTta-MB.

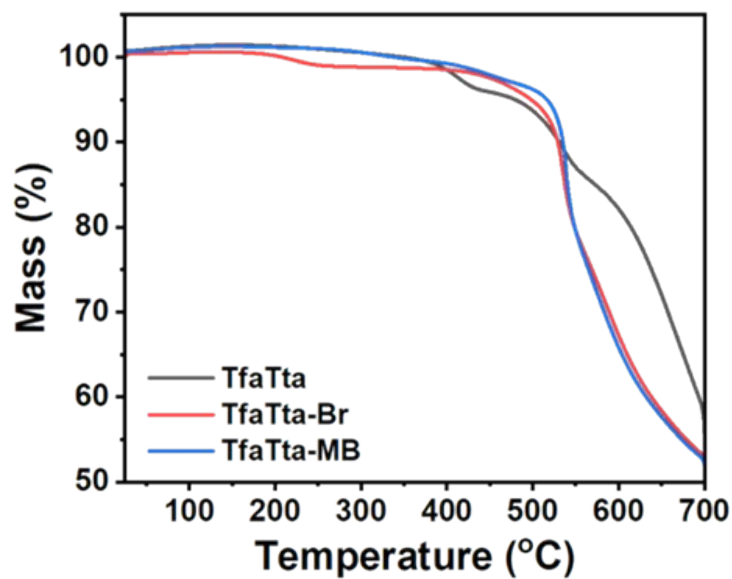

**Fig. S15** TGA analysis of TfaTta, TfaTta-Br and TfaTta-MB.

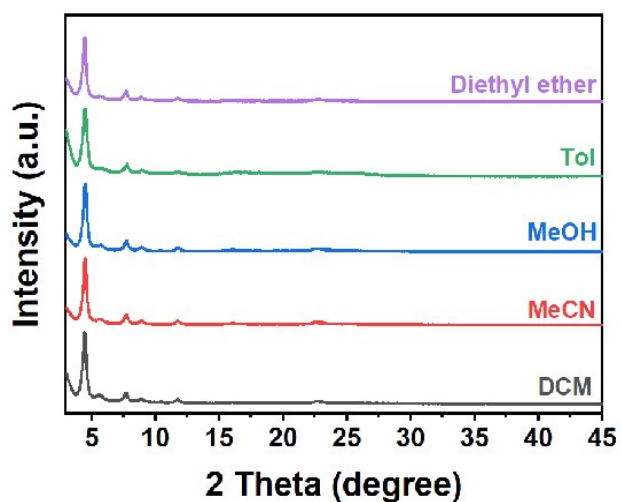

Fig. S16 PXRD patterns of TfaTta-MB after soaking in different organic solvents for 48 h.

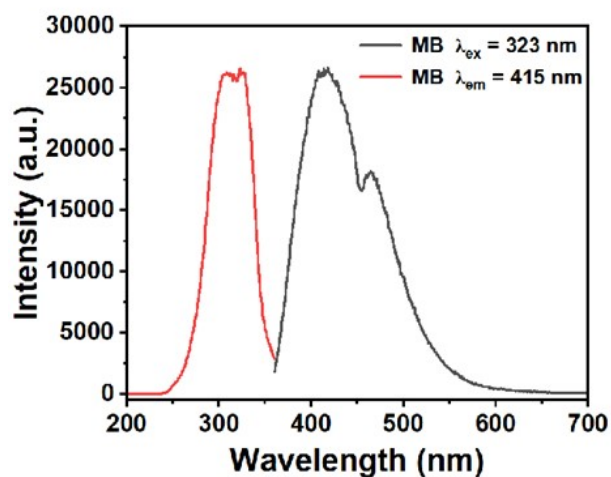

Fig S17 Excitation and emission spectra of MB.

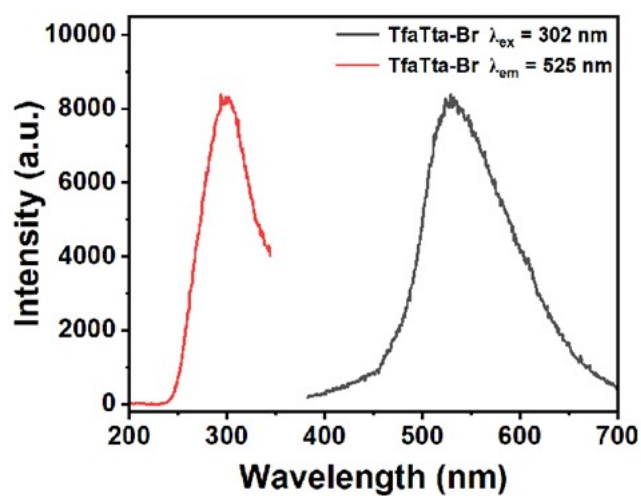

Fig. S18 Excitation and emission spectra of TfaTta-Br.

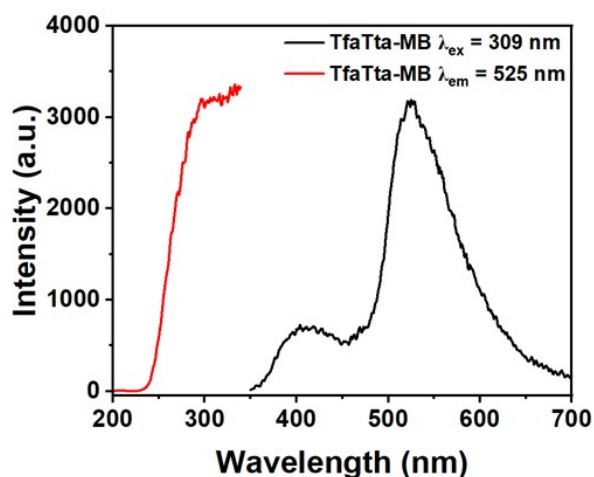

Fig. S19 Excitation and emission spectra of TfaTta-MB.

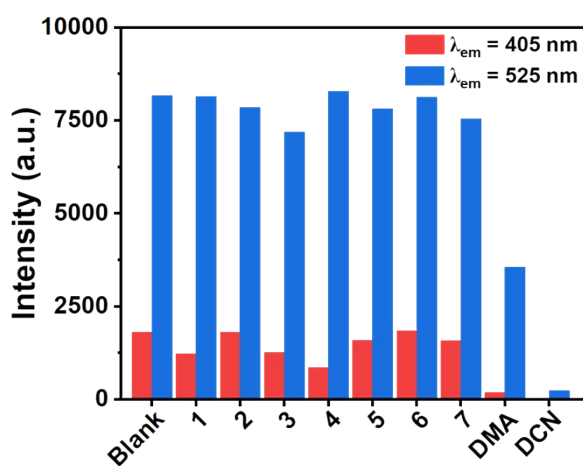

Fig. S20 Selectivity ability of TfaTta-MB toward various pesticides (1. sulfamethoxazole; 2. flusilazole; 3. cyfluthrin; 4. carboxin; 5. alidochlor; 6. methylparaben; 7. glyphosate).

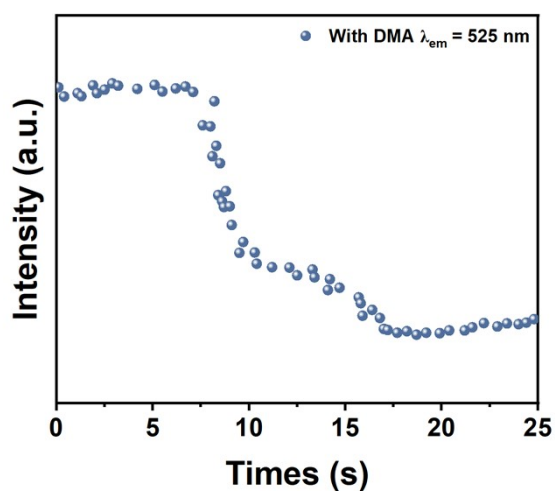

Fig. S21 Response time of TfaTta-MB to DMA at the emission of 525 nm.

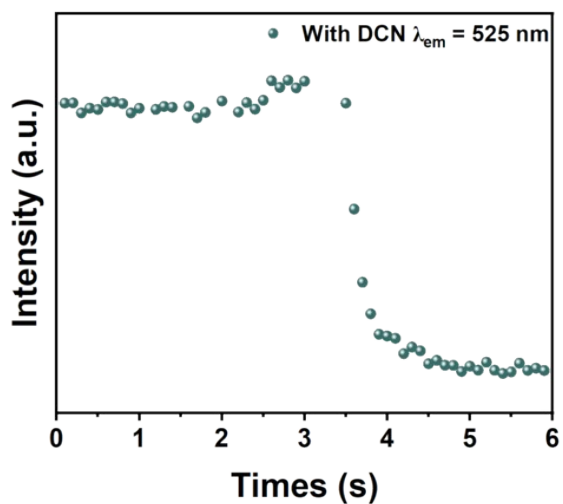

Fig. S22 Response time of TfaTta-MB to DCN at the emission of 525 nm.

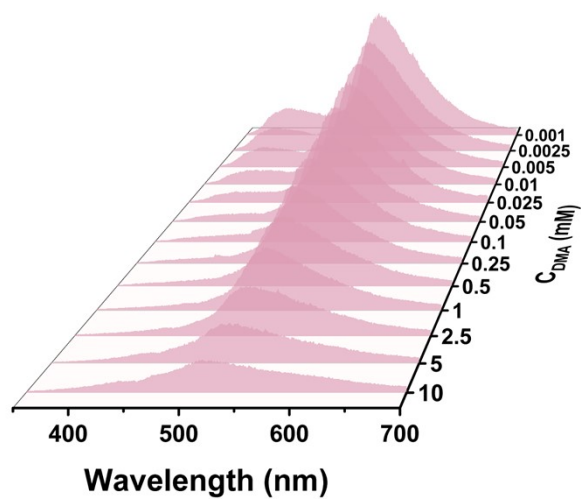

Fig. S23 The emission spectra of TfaTta-MB upon the gradual addition of DMA.

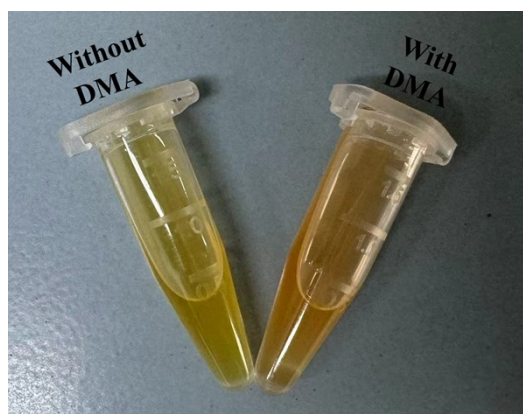

Fig. S24 The solvent of TfaTta-MB with and without DMA.

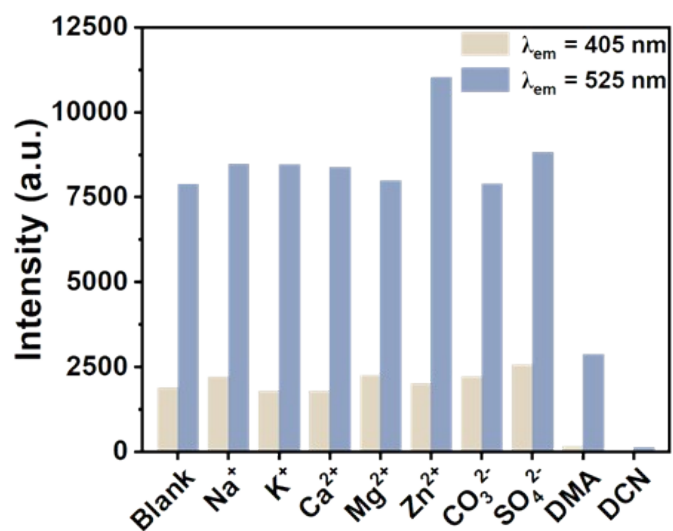

Fig. S25 Selectivity ability of TfaTta-MB toward common ions.

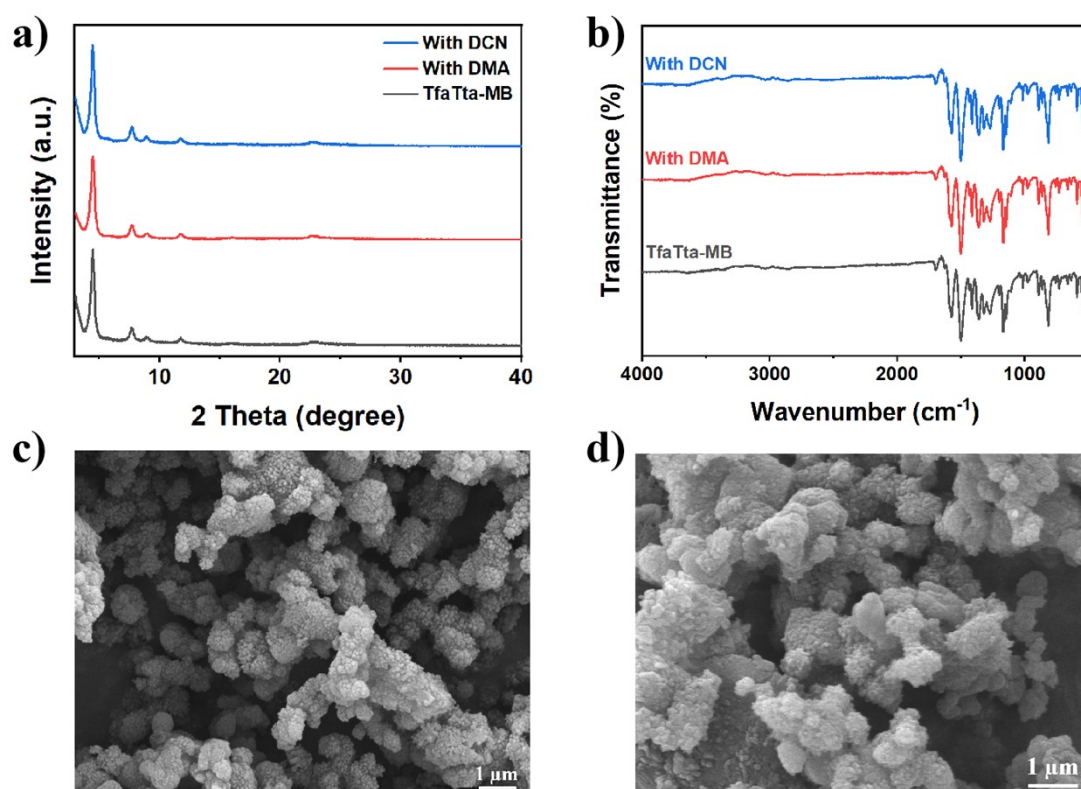

Fig. S26 a) PXRD patterns, b) FT-IR spectra and c-d) SEM images of post-sensing materials.

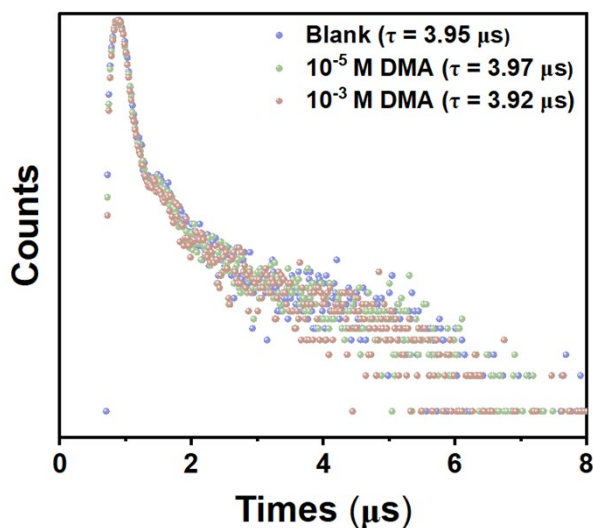

**Fig. S27** Lifetime decay curve ( $\lambda_{\text{ex}} = 309 \text{ nm}$ ,  $\lambda_{\text{em}} = 405 \text{ nm}$ ) of TfaTta-MB with and without DMA.

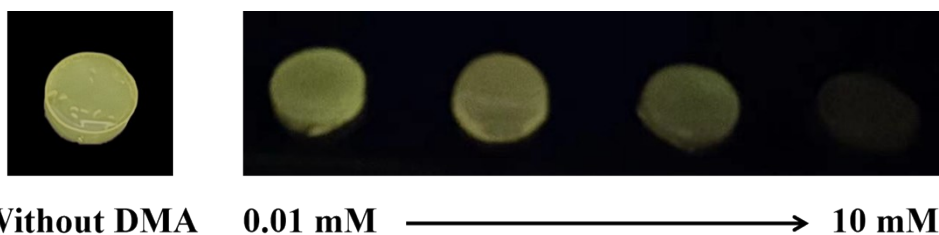

**Fig. S28** Photos of TfaTta-MB/AG under 365 nm UV light after immersing in different concentrations of DMA.

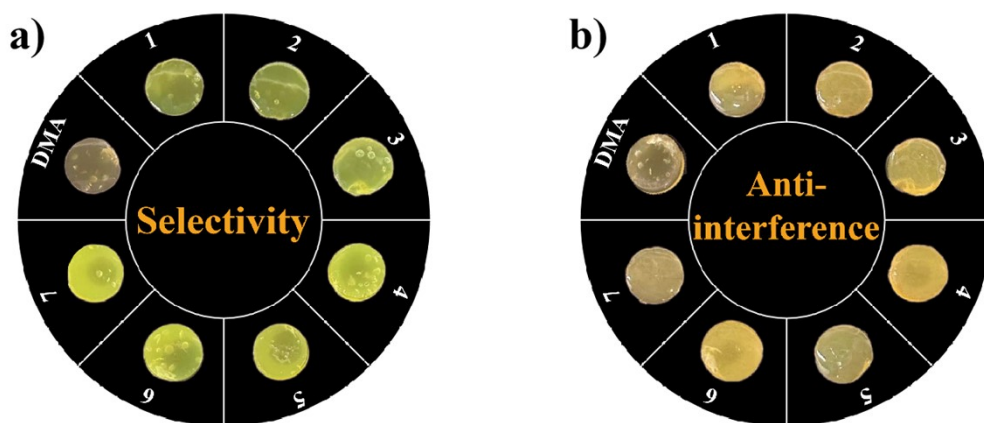

**Fig. S29** a) Selectivity and b) anti-interference ability of TfaTta-MB/AG towards different pesticides (1. sulfamethoxazole; 2. flusilazole; 3. cyfluthrin; 4. carboxin; 5. alidochlor; 6. methylparaben; 7. glyphosate).

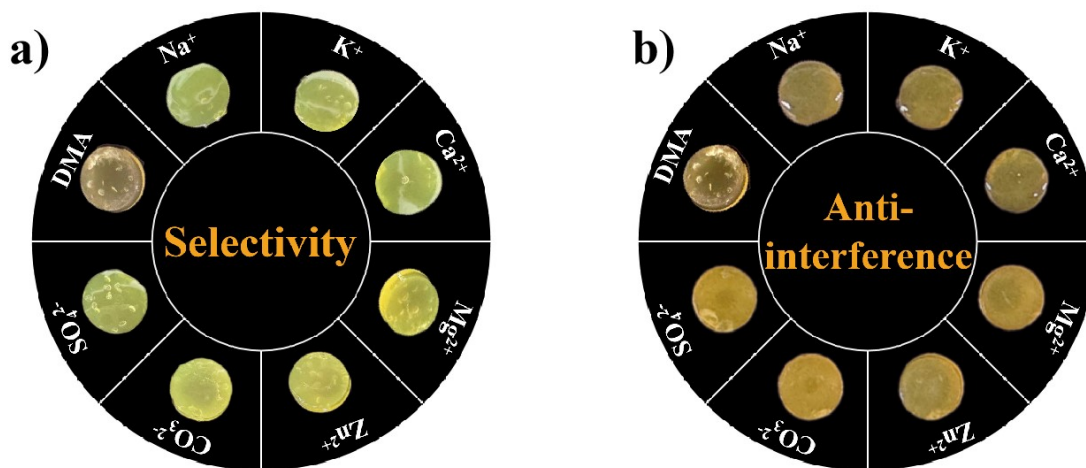

**Fig. S30** a) Selectivity and b) anti-interference ability of TfaTta-MB/AG towards different ions.

**Table S1** Fractional atomic coordinates of TfaTta.

| Space group: P3                                                      |                   |                   |                   |
|----------------------------------------------------------------------|-------------------|-------------------|-------------------|
| $a = 23.61 \text{ \AA}, b = 23.61 \text{ \AA}, c = 3.94 \text{ \AA}$ |                   |                   |                   |
| $\alpha = \beta = 90^\circ, \gamma = 120^\circ$                      |                   |                   |                   |
| Atom                                                                 | $x (\text{ \AA})$ | $y (\text{ \AA})$ | $z (\text{ \AA})$ |
| C1                                                                   | 0.73794           | 0.37633           | 0.08658           |
| C2                                                                   | 0.64258           | 0.42223           | -0.06951          |
| C3                                                                   | 0.60183           | 0.44933           | -0.06945          |
| C4                                                                   | 0.5402            | 0.41626           | 0.08549           |
| C5                                                                   | 0.52046           | 0.35598           | 0.24078           |
| C6                                                                   | 0.56159           | 0.32932           | 0.24217           |
| C7                                                                   | 0.49602           | 0.4436            | 0.08817           |
| N8                                                                   | 0.51301           | 0.49929           | -0.05678          |
| C9                                                                   | 0.47456           | 0.53094           | -0.07406          |
| C10                                                                  | 0.50608           | 0.59728           | -0.1604           |
| C11                                                                  | 0.47129           | 0.63075           | -0.17642          |
| C12                                                                  | 0.40375           | 0.59802           | -0.11052          |
| C13                                                                  | 0.37173           | 0.53097           | -0.03238          |
| C14                                                                  | 0.40666           | 0.49765           | -0.01439          |
| C15                                                                  | 0.36708           | 0.63374           | -0.11905          |
| N16                                                                  | 0.39953           | 0.70017           | -0.11874          |
| H17                                                                  | 0.68951           | 0.4499            | -0.18695          |
| H18                                                                  | 0.61867           | 0.49613           | -0.19179          |
| H19                                                                  | 0.47307           | 0.32936           | 0.36236           |
| H20                                                                  | 0.54367           | 0.28259           | 0.35996           |
| H21                                                                  | 0.44989           | 0.4169            | 0.22056           |
| H22                                                                  | 0.5581            | 0.62335           | -0.21193          |



|     |         |         |          |
|-----|---------|---------|----------|
| H23 | 0.49732 | 0.68221 | -0.24115 |
| H24 | 0.31968 | 0.50424 | 0.0182   |
| H25 | 0.38001 | 0.44597 | 0.04244  |
| N26 | 0.66667 | 0.33333 | 0.08684  |

**Table S2** Fractional atomic coordinates of TfaTta-Br.

| <b>Space group: P1</b><br><b><math>a = 6.50 \text{ \AA}</math>, <math>b = 22.99 \text{ \AA}</math>, <math>c = 22.91 \text{ \AA}</math></b><br><b><math>\alpha = 60^\circ</math>, <math>\beta = \gamma = 90^\circ</math></b> |                  |                  |                  |
|-----------------------------------------------------------------------------------------------------------------------------------------------------------------------------------------------------------------------------|------------------|------------------|------------------|
| Atom                                                                                                                                                                                                                        | $x (\text{\AA})$ | $y (\text{\AA})$ | $z (\text{\AA})$ |
| C1                                                                                                                                                                                                                          | -1.11135         | 0.28272          | -0.93748         |
| C2                                                                                                                                                                                                                          | -1.01718         | 0.15818          | -0.81579         |
| C3                                                                                                                                                                                                                          | -0.98803         | 0.09025          | -0.76982         |
| C4                                                                                                                                                                                                                          | -1.14867         | 0.05183          | -0.72744         |
| C5                                                                                                                                                                                                                          | -1.33123         | 0.0839           | -0.72711         |
| C6                                                                                                                                                                                                                          | -1.36124         | 0.1519           | -0.77403         |
| C7                                                                                                                                                                                                                          | -1.12902         | -0.02157         | -0.68538         |
| N8                                                                                                                                                                                                                          | -1.00506         | -0.05387         | -0.70374         |
| C9                                                                                                                                                                                                                          | -0.97783         | -0.12533         | -0.6693          |
| C10                                                                                                                                                                                                                         | -0.91308         | -0.1554          | -0.70634         |
| C11                                                                                                                                                                                                                         | -0.88569         | -0.22497         | -0.67481         |
| C12                                                                                                                                                                                                                         | -0.91776         | -0.26538         | -0.60514         |
| C13                                                                                                                                                                                                                         | -0.97848         | -0.23484         | -0.56782         |
| C14                                                                                                                                                                                                                         | -1.00904         | -0.16553         | -0.59956         |
| C15                                                                                                                                                                                                                         | -0.88779         | -0.33894         | -0.5709          |
| N16                                                                                                                                                                                                                         | -0.89417         | -0.37237         | -0.6058          |
| H17                                                                                                                                                                                                                         | -0.88686         | 0.18583          | -0.84593         |
| H18                                                                                                                                                                                                                         | -0.84029         | 0.06756          | -0.76794         |
| H19                                                                                                                                                                                                                         | -1.45395         | 0.05583          | -0.6923          |
| H20                                                                                                                                                                                                                         | -1.50475         | 0.17418          | -0.77164         |
| H21                                                                                                                                                                                                                         | -1.23236         | -0.04845         | -0.64306         |
| H22                                                                                                                                                                                                                         | -0.88629         | -0.12481         | -0.76003         |
| H23                                                                                                                                                                                                                         | -0.83722         | -0.24699         | -0.70475         |
| H24                                                                                                                                                                                                                         | -1.00399         | -0.26459         | -0.51399         |
| H25                                                                                                                                                                                                                         | -1.05348         | -0.14352         | -0.56931         |
| C26                                                                                                                                                                                                                         | -1.2129          | 0.18886          | -0.82476         |
| C27                                                                                                                                                                                                                         | -1.03458         | 0.30394          | -0.82049         |
| C28                                                                                                                                                                                                                         | -1.00522         | 0.34194          | -0.78889         |
| C29                                                                                                                                                                                                                         | -1.16844         | 0.37853          | -0.78304         |
| C30                                                                                                                                                                                                                         | -1.36098         | 0.37638          | -0.80917         |
| C31                                                                                                                                                                                                                         | -1.39211         | 0.33786          | -0.84002         |
| C32                                                                                                                                                                                                                         | -1.14212         | 0.41999          | -0.75087         |

|     |          |          |          |
|-----|----------|----------|----------|
| N33 | -0.98414 | 0.41242  | -0.71282 |
| C34 | -0.95063 | -0.54893 | -0.68003 |
| C35 | -0.84954 | -0.5789  | -0.61769 |
| C36 | -0.82271 | -0.54365 | -0.58303 |
| C37 | -0.89203 | -0.47696 | -0.61112 |
| C38 | -0.98562 | -0.44606 | -0.67505 |
| C39 | -1.01542 | -0.4817  | -0.70907 |
| C40 | -0.87328 | -0.4404  | -0.57329 |
| N41 | -0.84643 | -0.47482 | -0.50522 |
| H42 | -0.90364 | 0.27747  | -0.82492 |
| H43 | -0.85393 | 0.34334  | -0.76983 |
| H44 | -1.4893  | 0.40436  | -0.80524 |
| H45 | -1.54584 | 0.33868  | -0.85815 |
| H46 | -1.26372 | 0.45486  | -0.75683 |
| H47 | -0.79626 | -0.63033 | -0.5951  |
| H48 | -0.74826 | -0.56869 | -0.53418 |
| H49 | -1.03987 | -0.39468 | -0.69831 |
| H50 | -1.08809 | -0.4565  | -0.75817 |
| C51 | -1.22901 | 0.30033  | -0.84673 |
| C52 | -1.06946 | 0.35227  | -0.97941 |
| C53 | -0.98091 | 0.37728  | -1.04319 |
| C54 | -0.93614 | 0.33411  | -1.0682  |
| C55 | -0.97067 | 0.26541  | -1.02719 |
| C56 | -1.05379 | 0.24004  | -0.9631  |
| C57 | -0.87009 | 0.35952  | -1.13841 |
| N58 | -0.87441 | 0.42332  | -1.1819  |
| C59 | -0.8404  | -0.54615 | -0.25322 |
| C60 | -0.81695 | -0.47645 | -0.29025 |
| C61 | -0.80842 | -0.44292 | -0.36046 |
| C62 | -0.82473 | -0.47859 | -0.3954  |
| C63 | -0.8409  | -0.54891 | -0.35821 |
| C64 | -0.84974 | -0.58248 | -0.28778 |
| C65 | -0.83972 | -0.44173 | -0.46991 |
| N66 | -0.86129 | -0.37403 | -0.50323 |
| H67 | -1.11621 | 0.38844  | -0.96492 |
| H68 | -0.95718 | 0.43092  | -1.0742  |
| H69 | -0.94316 | 0.23128  | -1.04603 |
| H70 | -1.09278 | 0.18724  | -0.93662 |
| H71 | -0.83025 | 0.32339  | -1.15365 |
| H72 | -0.81114 | -0.44773 | -0.26454 |
| H73 | -0.79491 | -0.38871 | -0.38735 |
| H74 | -0.85471 | -0.57785 | -0.38352 |
| H75 | -0.87257 | -0.6362  | -0.26145 |

|      |          |         |          |
|------|----------|---------|----------|
| N76  | -1.25361 | 0.25874 | -0.87913 |
| C77  | -1.46665 | 0.26505 | -0.90853 |
| C78  | -1.5011  | 0.22633 | -0.94577 |
| C79  | -1.48315 | 0.25967 | -1.01653 |
| C80  | -1.50219 | 0.22417 | -1.05107 |
| C81  | -1.54747 | 0.15563 | -1.01582 |
| C82  | -1.57371 | 0.12254 | -0.94601 |
| C83  | -1.5508  | 0.15756 | -0.91111 |
| H84  | -1.49903 | 0.31895 | -0.94506 |
| H85  | -1.58937 | 0.25035 | -0.87035 |
| H86  | -1.44817 | 0.31283 | -1.04477 |
| H87  | -1.48352 | 0.24998 | -1.10524 |
| H88  | -1.56403 | 0.1283  | -1.04266 |
| H89  | -1.61133 | 0.06957 | -0.91881 |
| H90  | -1.57316 | 0.13073 | -0.85732 |
| Br91 | -0.60692 | 0.21013 | -1.66113 |

**Table S3** Fractional atomic coordinates of TfaTta-MB.

| <b>Space group: P1</b><br>$a = 23.01 \text{ \AA}, b = 22.88 \text{ \AA}, c = 12.88 \text{ \AA}$<br>$\alpha = \beta = 90^\circ, \gamma = 120^\circ$ |                  |                  |                  |
|----------------------------------------------------------------------------------------------------------------------------------------------------|------------------|------------------|------------------|
| Atom                                                                                                                                               | $x (\text{\AA})$ | $y (\text{\AA})$ | $z (\text{\AA})$ |
| C1                                                                                                                                                 | 0.73582          | 0.37353          | 1.70175          |
| C2                                                                                                                                                 | 0.63179          | 0.3808           | 1.57992          |
| C3                                                                                                                                                 | 0.58779          | 0.39975          | 1.53685          |
| C4                                                                                                                                                 | 0.52474          | 0.37739          | 1.58179          |
| C5                                                                                                                                                 | 0.50384          | 0.33095          | 1.66313          |
| C6                                                                                                                                                 | 0.54843          | 0.31374          | 1.70784          |
| C7                                                                                                                                                 | 0.48203          | 0.40532          | 1.55094          |
| N8                                                                                                                                                 | 0.50928          | 0.46945          | 1.53348          |
| C9                                                                                                                                                 | 0.47411          | 0.50633          | 1.52314          |
| C10                                                                                                                                                | 0.50977          | 0.57589          | 1.54183          |
| C11                                                                                                                                                | 0.47705          | 0.61354          | 1.54132          |
| C12                                                                                                                                                | 0.40782          | 0.58204          | 1.52287          |
| C13                                                                                                                                                | 0.37229          | 0.51241          | 1.50116          |
| C14                                                                                                                                                | 0.40509          | 0.47484          | 1.50036          |
| C15                                                                                                                                                | 0.37207          | 0.62052          | 1.53339          |
| N16                                                                                                                                                | 0.40707          | 0.68899          | 1.54032          |
| H17                                                                                                                                                | 0.67802          | 0.39602          | 1.53848          |
| H18                                                                                                                                                | 0.60303          | 0.43199          | 1.4687           |
| H19                                                                                                                                                | 0.4538           | 0.31004          | 1.69522          |
| H20                                                                                                                                                | 0.52954          | 0.27736          | 1.77004          |
| H21                                                                                                                                                | 0.42847          | 0.37457          | 1.56342          |

|     |         |         |         |
|-----|---------|---------|---------|
| H22 | 0.56297 | 0.60084 | 1.55862 |
| H23 | 0.50592 | 0.66696 | 1.55839 |
| H24 | 0.3189  | 0.4869  | 1.48622 |
| H25 | 0.37614 | 0.42154 | 1.4826  |
| C26 | 0.61629 | 0.34448 | 1.67508 |
| C27 | 0.65004 | 0.24491 | 1.59637 |
| C28 | 0.62909 | 0.17931 | 1.56288 |
| C29 | 0.59746 | 0.12527 | 1.63188 |
| C30 | 0.58869 | 0.13801 | 1.73524 |
| C31 | 0.61125 | 0.20386 | 1.76964 |
| C32 | 0.57023 | 0.05572 | 1.59421 |
| N33 | 0.52202 | 0.00649 | 1.64553 |
| C34 | 0.48672 | 0.93625 | 1.61936 |
| C35 | 0.43063 | 0.89364 | 1.67899 |
| C36 | 0.39397 | 0.8248  | 1.6584  |
| C37 | 0.41313 | 0.79704 | 1.57758 |
| C38 | 0.46939 | 0.83932 | 1.51744 |
| C39 | 0.50611 | 0.90877 | 1.5381  |
| C40 | 0.3748  | 0.72392 | 1.55907 |
| N41 | 0.30718 | 0.69016 | 1.57116 |
| H42 | 0.67185 | 0.28546 | 1.54094 |
| H43 | 0.63653 | 0.17085 | 1.4825  |
| H44 | 0.56476 | 0.09699 | 1.79038 |
| H45 | 0.60245 | 0.20948 | 1.85004 |
| H46 | 0.588   | 0.04737 | 1.52132 |
| H47 | 0.41521 | 0.9143  | 1.74193 |
| H48 | 0.35096 | 0.79294 | 1.70629 |
| H49 | 0.48437 | 0.81881 | 1.4543  |
| H50 | 0.54925 | 0.93998 | 1.49044 |
| C51 | 0.64244 | 0.25935 | 1.70046 |
| C52 | 0.78198 | 0.34997 | 1.71315 |
| C53 | 0.85067 | 0.39219 | 1.69595 |
| C54 | 0.8762  | 0.45992 | 1.66869 |
| C55 | 0.83228 | 0.48521 | 1.66245 |
| C56 | 0.76387 | 0.44364 | 1.68224 |
| C57 | 0.9483  | 0.50517 | 1.64787 |
| N58 | 0.99049 | 0.48324 | 1.65569 |
| C59 | 0.061   | 0.52033 | 1.63252 |
| C60 | 0.09999 | 0.49152 | 1.66001 |
| C61 | 0.16825 | 0.52384 | 1.63554 |
| C62 | 0.19884 | 0.58596 | 1.5837  |
| C63 | 0.16002 | 0.61496 | 1.55547 |
| C64 | 0.09146 | 0.58202 | 1.57819 |

|      |         |         |          |
|------|---------|---------|----------|
| C65  | 0.27159 | 0.62194 | 1.56368  |
| N66  | 0.30423 | 0.5873  | 1.54575  |
| H67  | 0.76507 | 0.29864 | 1.73743  |
| H68  | 0.88376 | 0.37209 | 1.7062   |
| H69  | 0.85103 | 0.53789 | 1.64479  |
| H70  | 0.73335 | 0.46742 | 1.68415  |
| H71  | 0.96481 | 0.55676 | 1.62556  |
| H72  | 0.07746 | 0.44378 | 1.70061  |
| H73  | 0.19768 | 0.50126 | 1.65958  |
| H74  | 0.18276 | 0.66297 | 1.51496  |
| H75  | 0.0632  | 0.60535 | 1.55245  |
| N76  | 0.66408 | 0.32973 | 1.73039  |
| C77  | 0.66108 | 0.3381  | 1.84612  |
| C78  | 0.68922 | 0.41063 | 1.88283  |
| C79  | 0.75303 | 0.44507 | 1.92889  |
| C80  | 0.78162 | 0.51328 | 1.95569  |
| C81  | 0.7468  | 0.54772 | 1.9359   |
| C82  | 0.68286 | 0.51352 | 1.89227  |
| C83  | 0.65358 | 0.44511 | 1.86728  |
| H84  | 0.68992 | 0.3175  | 1.88594  |
| H85  | 0.60965 | 0.30842 | 1.87807  |
| H86  | 0.78124 | 0.41946 | 1.94254  |
| H87  | 0.83126 | 0.53954 | 1.98976  |
| H88  | 0.76941 | 0.60076 | 1.95449  |
| H89  | 0.65606 | 0.54001 | 1.87558  |
| H90  | 0.6037  | 0.41986 | 1.83517  |
| C91  | 0.58388 | 1.109   | -0.77176 |
| C92  | 0.65179 | 1.14919 | -0.7988  |
| C93  | 0.68125 | 1.21929 | -0.80525 |
| C94  | 0.64391 | 1.25129 | -0.78423 |
| C95  | 0.57558 | 1.21076 | -0.75774 |
| C96  | 0.54556 | 1.14043 | -0.75463 |
| C97  | 0.67762 | 1.32675 | -0.78041 |
| C98  | 0.6461  | 1.36061 | -0.81161 |
| C99  | 0.74703 | 1.36423 | -0.73753 |
| C100 | 0.79761 | 1.42003 | -0.79072 |
| C101 | 0.8629  | 1.45484 | -0.75108 |
| C102 | 0.87861 | 1.43542 | -0.65732 |
| C103 | 0.82817 | 1.37968 | -0.604   |
| C104 | 0.76342 | 1.34343 | -0.64529 |
| C105 | 0.66624 | 1.42893 | -0.76952 |
| C106 | 0.63407 | 1.46145 | -0.79756 |
| C107 | 0.57955 | 1.43185 | -0.87588 |

|      |         |         |          |
|------|---------|---------|----------|
| C108 | 0.56051 | 1.36526 | -0.92042 |
| C109 | 0.59068 | 1.33131 | -0.88933 |
| N110 | 0.54941 | 1.46349 | -0.90929 |
| C111 | 0.56009 | 1.52702 | -0.87139 |
| C112 | 0.53508 | 1.53108 | -0.77399 |
| C113 | 0.54301 | 1.59241 | -0.73896 |
| C114 | 0.57681 | 1.65035 | -0.8     |
| C115 | 0.60135 | 1.64629 | -0.89757 |
| C116 | 0.59249 | 1.58458 | -0.93349 |
| S117 | 0.58588 | 1.72945 | -0.75669 |
| N118 | 0.55476 | 1.03669 | -0.76827 |
| N119 | 0.94471 | 1.47512 | -0.61526 |
| C120 | 0.99029 | 1.44955 | -0.60946 |
| C121 | 0.49141 | 0.98973 | -0.722   |
| C122 | 1.04994 | 1.48079 | -0.66772 |
| C123 | 1.0968  | 1.45925 | -0.65873 |
| C124 | 1.08494 | 1.4066  | -0.59095 |
| C125 | 1.02597 | 1.37563 | -0.53173 |
| C126 | 0.97884 | 1.39688 | -0.54078 |
| C127 | 0.45191 | 0.92607 | -0.76769 |
| C128 | 0.38922 | 0.88008 | -0.72661 |
| C129 | 0.36549 | 0.89696 | -0.63823 |
| C130 | 0.40577 | 0.95886 | -0.58927 |
| C131 | 0.46902 | 1.00471 | -0.62995 |
| S132 | 0.28222 | 0.84002 | -0.58922 |
| O133 | 0.23791 | 0.7724  | -0.65648 |
| O134 | 0.23612 | 0.87466 | -0.5799  |
| O135 | 0.28103 | 0.81349 | -0.47291 |
| S136 | 1.14605 | 1.37945 | -0.57864 |
| O137 | 1.17684 | 1.39293 | -0.46855 |
| O138 | 1.113   | 1.30169 | -0.58522 |
| O139 | 1.21327 | 1.41094 | -0.66373 |
| O140 | 0.54731 | 1.75602 | -0.83119 |
| O141 | 0.55856 | 1.72957 | -0.64116 |
| O142 | 0.66212 | 1.79107 | -0.757   |
| H143 | 0.68181 | 1.12601 | -0.81468 |
| H144 | 0.734   | 1.24887 | -0.82551 |
| H145 | 0.54539 | 1.23358 | -0.7388  |
| H146 | 0.49219 | 1.11115 | -0.73935 |
| H147 | 0.7868  | 1.43615 | -0.86336 |
| H148 | 0.90101 | 1.49788 | -0.79313 |
| H149 | 0.83753 | 1.365   | -0.52945 |
| H150 | 0.7259  | 1.2991  | -0.60548 |

|      |         |         |          |
|------|---------|---------|----------|
| H151 | 0.7048  | 1.45177 | -0.71047 |
| H152 | 0.64867 | 1.50982 | -0.762   |
| H153 | 0.52201 | 1.34377 | -0.97997 |
| H154 | 0.57613 | 1.28327 | -0.92628 |
| H155 | 0.50838 | 1.48612 | -0.72639 |
| H156 | 0.5229  | 1.59477 | -0.66441 |
| H157 | 0.62591 | 1.69043 | -0.94667 |
| H158 | 0.61018 | 1.58185 | -1.01023 |
| H159 | 0.57979 | 1.01593 | -0.80817 |
| H160 | 0.96673 | 1.52742 | -0.62488 |
| H161 | 1.06001 | 1.52174 | -0.72056 |
| H162 | 1.1425  | 1.48378 | -0.70403 |
| H163 | 1.01735 | 1.33604 | -0.47676 |
| H164 | 0.93523 | 1.37408 | -0.49084 |
| H165 | 0.46966 | 0.91257 | -0.83632 |
| H166 | 0.35884 | 0.83189 | -0.76419 |
| H167 | 0.38829 | 0.97162 | -0.51962 |
| H168 | 0.50002 | 1.05216 | -0.59038 |
| H169 | 1.2418  | 1.39289 | -0.63807 |

**Table S4** ICP-OES results of TfaTta-MB.

| Sample    | M <sub>0</sub> (g) | V <sub>0</sub> (mL) | Test element | C <sub>0</sub> (mg/L) | C <sub>1</sub> (mg/L) | C <sub>x</sub> (mg/kg) | W (%) |
|-----------|--------------------|---------------------|--------------|-----------------------|-----------------------|------------------------|-------|
| TfaTta-MB | 0.0157             | 25                  | S            | 12.887                | 12.887                | 20520.70               | 2.05  |

**Table S5** Summary of the methods for sensing DMA and DCN.

| Analyte | Method                                                            | Linear range/ $\mu$ M | LOD/ $\mu$ M  | Ref                |
|---------|-------------------------------------------------------------------|-----------------------|---------------|--------------------|
| DMA     | competitive indirect enzyme-linked immunosorbent assay (CI-ELISA) | 0.045-45              | 0.01          | [S1]               |
|         | surfactant assisted electromembrane extraction (SEME)             | 0.09-3.2              | 0.027         | [S2]               |
|         | Capillary electrophoresis-ultra violet (CE-UV)                    | 0.13-2.3              | 0.045         | [S3]               |
|         | lateral flow immunochromatographic strip (LFIC)                   | 0-1.4                 | 0.45          | [S4]               |
|         | <b>Fluorescence</b>                                               | <b>1-100</b>          | <b>0.0241</b> | <b>This method</b> |
| DCN     | Fluorescence                                                      | 0.3-30                | 0.12          | [S5]               |
|         | Fluorescence                                                      | 0.46-59.64            | 0.14          | [S6]               |

|              |          |       |             |
|--------------|----------|-------|-------------|
| Fluorescence | 0-120    | 0.67  | [S7]        |
| Fluorescence | 0-100    | 0.95  | [S8]        |
| Fluorescence | 0-19     | 1.9   | [S9]        |
| Fluorescence | 5 – 1000 | 0.128 | This method |

## References

- S1 B. S. Clegg, G. R. Stephenson and J. C. Hall, Development of an enzyme-linked immunosorbent assay for the detection of dicamba, *J. Agric. Food Chem.*, 2001, **49**, 2168.
- S2 H. Bagheri, A. R. Fakhari and A. Sahragard, A novel strategy based on surfactant assisted electromembrane extraction for the determination of dicamba and 2,4-DB as model herbicides in real water samples, *RSC Adv.*, 2016, **6**, 4843.
- S3 H. Tabani, A. R. Fakhari and E. Zand, Low-voltage electromembrane extraction combined with cyclodextrin modified capillary electrophoresis for the determination of phenoxy acid herbicides in environmental samples, *Anal. Methods*, 2013, **5**, 1548.
- S4 M. Qi, J. Huo, Z. Li, C. He, D. Li, Y. Wang, N. Vasylieva, J. Zhang and B. D. Hammock, On-spot quantitative analysis of dicamba in field waters using a lateral flow immunochromatographic strip with smartphone imaging, *Anal. Bioanal. Chem.*, 2020, **412**, 6995.
- S5 Y. Zhang, Y. Liu, P. G. Karmaker, L. Zhang, K. Yang, L. Chen and X. Yang, Fabrication of two luminescent imidazolyl cadmium-organic frameworks and their sensing mechanism for 2,6-dichloro-4-nitroaniline, *ACS Appl. Mater. Interfaces*, 2023, **15**, 6177.
- S6 Y. Liu, Y. Zhang, P. G. Karmaker, Y. Tang, L. Zhang, F. Huo, Y. Wang and X. Yang, Dual-color 2D lead-organic framework with two-fold interlocking structures for the detection of nitrofurantoin antibiotics and 2,6-dichloro-4-nitroaniline, *ACS Appl. Mater. Interfaces*, 2022, **14**, 51531.
- S7 Y. Cheng, Y. Ma, X. Yang, H. Li, Z. Zhang and D. Schipper, A 24-metal Cd(ii)-Sm(iii) nanocage with a rapid triple-emissive response for 2,6-dichloro-4-nitroaniline, *Inorg. Chem. Front.*, 2023, **10**, 417.
- S8 X. Leng, X. Yang, Y. Ma, C. Wang, H. Li, Z. Zhang, K. Yang and D. Schipper, Rapid and reliable triple-emissive detection of 2,6-dichloro-4-nitroaniline as a pesticide based on a high-nuclear Cd(ii)-Sm(iii) nanocluster, *Dalton Trans.*, 2022, **51**, 16522.
- S9 X. Guo, Z. Dong, F. Zhao, Z. Liu and Y. Wang, Zinc(ii)-organic framework as a multi-responsive photoluminescence sensor for efficient and recyclable detection of pesticide 2,6-dichloro-4-nitroaniline, Fe(iii) and Cr(vi), *New J. Chem.*, 2019, **43**, 2353.
